1 **Psychiatric hospital admissions and linkages to ambulatory services in the Western Cape Province of**  
2 **South Africa (2015-2022): trends, risk factors and possible opportunities for intervention**

3

4 Hannah Hussey<sup>1,2</sup>, Timothy Mountford<sup>1</sup>, Alexa Heekes<sup>1</sup>, Carol Dean<sup>3</sup>, Marinda Roelofse<sup>3</sup>, Lynne  
5 Hendricks<sup>3</sup>, Qhama Cossie<sup>4,5</sup>, Liezel Koen<sup>6,7</sup>, Warren Cesar<sup>8</sup>, Vanessa Lomas<sup>9,10</sup>, David Pienaar<sup>11</sup>, Giovanni  
6 Perez<sup>9</sup>, Andrew Boule<sup>1,2</sup>, Katherine Sorsdahl<sup>12</sup>, Hassan Mahomed<sup>9,13</sup>

- 7 1. Provincial Health Data Centre, Health Intelligence, Western Cape Department of Health and  
8 Wellness
- 9 2. School of Public Health, University of Cape Town
- 10 3. Specialised Hospitals, Metro Health Services, Western Cape Department of Health and Wellness
- 11 4. Valkenberg Psychiatric Hospital, Western Cape Department of Health and Wellness
- 12 5. Department of Mental Health & Psychiatry, University of Cape Town
- 13 6. Stikland Psychiatric Hospital, Western Cape Department of Health and Wellness
- 14 7. Department of Psychiatry, Faculty of Medicine and Health Sciences, University of  
15 Stellenbosch
- 16 8. Lentegeur Psychiatric Hospital, Western Cape Department of Health and Wellness
- 17 9. Metro Health Services, Western Cape Department of Health and Wellness
- 18 10. Department of Family and Emergency Medicine, University of Stellenbosch
- 19 11. Rural Health Services, Western Cape Department of Health and Wellness
- 20 12. Alan J. Flisher Centre for Public Mental Health, Department of Psychiatry & Mental Health,  
21 University of Cape Town
- 22 13. Division of Health Systems and Public Health, Department of Global Health, Faculty of Medicine  
23 and Health Sciences, Stellenbosch University

24

25 Contributing author: Hannah Hussey (hannah.hussey@westerncape.gov.za)

26

27

28

29 Author contributions

30 HH conceptualized the research, performed the formal analysis and visualization, and wrote the original

31 draft

32 TM & AH were responsible for data curation

33 CD, LH, MR, GP assisted with the conceptualization of the research

34 QC, LK, WC, VL, DP and AB assisted with reviewing and editing

35 KS and HM assisted with reviewing and editing, as well as supervision

36

37

38

39

40 Abstract

41 Background

42 Psychiatric hospital admissions in the Western Cape are increasing, driven by poverty and substance  
43 use.

44 Aim

45 To assess the trend of psychiatric admissions from 2015-2022 and factors associated with repeat  
46 psychiatric admissions and linkage to ambulatory services post-discharge.

47 Setting

48 Public hospitals in the Western Cape, South Africa

49 Methods

50 Using electronic data from the Provincial Health Data Centre, a consolidated routine service database,  
51 all psychiatric hospital admissions in the Western Cape were analyzed, stratified by hospital level. Mixed  
52 effects logistic regression was used to determine factors associated with successful linkage to  
53 ambulatory services within 30 days following hospital discharge, and repeat psychiatric admission within  
54 30 and 90 days.

55 Results

56 Psychiatric hospital admissions, particularly at the district/acute level, were increasing prior to 2020 and  
57 an increasing proportion were substance related. 40% of admissions at the district level had not been  
58 seen at a primary health care facility in the year prior to admission. Males and those with substance use  
59 disorders were less likely to be successfully linked to outpatient services post-discharge. Successful

60 linkage was most protective against readmission within 90 days with an adjusted odds ratio of 0.76  
61 (95%CI 0.73-0.79) and 0.45 (95%CI 0.42-0.49) at district/acute and specialized hospitals respectively.

## 62 Conclusion

63 Improving linkage to ambulatory services for mental health patients post-discharge is likely to avert  
64 hospital readmissions.

65

## 66 Contribution

67 This research highlights how often mental health patients requiring admissions are not seen at the  
68 primary health care level and quantifies the risk for readmission of not following up psychiatric  
69 admissions post-discharge.

70

71

72

73

74 Abstract word count: 250

75 Manuscript word count: 3 990

76

77 Background

78 Prior to the COVID-19 pandemic, and consistent with international trends, there was already a high and  
79 increasing prevalence of mental health conditions in the Western Cape Province of South Africa (1).  
80 Recent surveys in the Western Cape have found that 31.8% of respondents had depression, and that the  
81 lifetime prevalence for a substance use disorder was 20.6% (2,3). Nationally, neuropsychiatric disorders  
82 are the third highest contributors to disability-adjusted life-years, after HIV/AIDS and other infectious  
83 diseases, surpassing other non-communicable diseases (4). Factors such as poverty, food insecurity,  
84 experiences of trauma and violence, substance use and comorbid illnesses are all known drivers of this  
85 mental health burden (1,3,5–7).

86 Into this setting, the COVID-19 pandemic occurred, simultaneously exacerbating the burden of mental  
87 health disorders, while diverting resources away from mental health care towards COVID-19 services (8–  
88 10). The economic crises and resultant job losses precipitated by COVID-19 also resulted in an increase  
89 in depressive symptoms in South Africa (11). High rates of depression, anxiety and post-traumatic stress  
90 disorder were also documented in South African healthcare workers during the pandemic (12). In  
91 addition, SARS-CoV-2 infection itself can have neuropsychiatric manifestations, including index-episode  
92 psychosis (13).

93 This increase in mental health disorders has particularly impacted in-patient services, where hospital  
94 managers have reported struggling to cope with high admission numbers. And while the majority of  
95 patients with mental health conditions do not require inpatient care, inpatient expenditure represented  
96 86% of total mental health expenditure in the public health services in South Africa, with specialized  
97 psychiatric hospital admissions alone requiring 46% (14). In an increasingly financially constrained  
98 environmental, it is crucial to understand how admissions can be reduced and what factors influence  
99 this.

100 This study therefore aimed to describe and interrogate trends in psychiatric hospital admissions from  
101 2015-2022, with a particular focus on the possible impact of substance use and COVID-19. This study  
102 will also take into account ambulatory visits before and after admissions, as possible opportunities for  
103 interventions.

104

105 Methods

106 *Setting*

107 The Western Cape Province of South Africa has a population of 7.1 million individuals, 74.9% of whom  
108 are reliant on public health services (15). For psychiatric services, the adult population has 33 district  
109 hospitals, four regional hospitals and two central hospitals (which we grouped together as  
110 “district/acute hospitals” for this analysis), all of whom refer to the three specialised psychiatric  
111 hospitals of Lentegeur, Stikland and Valkenberg. In the public sector in South Africa, the inpatient  
112 services treatment gap is high at 89%, with only 0.31 psychiatrists and 0.97 psychologists available per  
113 100 000 population (16).

114

115 *Data sources*

116 The Provincial Health Data Centre (PHDC) collates all available patient-level electronic health data  
117 captured into routine health information systems within public health facilities in the Western Cape  
118 province (17). This includes admissions to psychiatric wards, derived from Clinicom, a patient  
119 administration database used at all public hospitals in the province, as well as eCCR (electronic  
120 Continuity of Care Record), the electronic discharge summary that includes information on discharge  
121 diagnoses using ICD-10 coding. Using a unique patient identifier, the admissions are linked to the

122 patients' interactions with the provincial health system at hospital and primary care levels prior to  
123 admission and following discharge.

124

#### 125 *Study population and inclusion/exclusion criteria*

126 Individuals of all ages with a psychiatric hospital admission start date from 1 January 2015 to 31  
127 December 2022 in a Western Cape public health facility were included. As ICD-10 diagnostic coding was  
128 not always reliable enough to identify psychiatric patients, admitting specialty was used instead. A  
129 psychiatric hospital admission was defined as:

- 130 • An admission to a specialized psychiatric hospital OR
- 131 • An admission to any other hospital in the province, where patients were admitted to the  
132 specialty of "Psychiatry" on Clinicom

133 Patients with psychiatric conditions seen only in the Emergency Centres or those admitted to other  
134 specialties (e.g., suicidal patients admitted to the General Medicine Department following an overdose)  
135 were not included.

136

#### 137 *Data analysis*

138 Firstly, descriptive data looking at trends in admission numbers, diagnoses and outcomes after discharge  
139 are presented. First contacts with the public health system, following hospital discharge are also  
140 explored. While this is not limited to mental health ambulatory services only, as these can be difficult to  
141 distinguish electronically at the primary health care (PHC) level, the assumption is that as all patients  
142 are given a follow-up date after discharge, a visit directly after discharge was assumed to be most likely  
143 related to the preceding admission. PHC visits in the year preceding a psychiatric admission to an

144 district/acute hospital are also assessed. PHC visits within 24 hours of a hospital admission were  
145 excluded here, i.e., those PHC visits where the patient could have been referred on for hospital care  
146 were not included, but those PHC visits where the patient went home after and were unrelated to the  
147 current hospital admission were. Where appropriate trends are highlighted using Microsoft PowerBI  
148 (Version: 2.116).

149  
150 The second analytical section is restricted to adult general psychiatry patients, as they are the patient  
151 population putting the most pressure on services, discharged home from either a district/acute hospital  
152 or a specialized hospital, i.e., admissions that result in transfers from a district/acute hospital to a  
153 specialized hospital are excluded. Elective therapeutic admissions to specialized hospitals were also  
154 excluded. Any individuals who were known to be deceased (in-facility deaths of individuals with a  
155 previous psychiatric admission) were also excluded. Stata (13.1, StataCorp. LLC, College Station, TX) was  
156 used for the analysis. The outcomes assessed were:

- 157 • Successful linkage to care post-discharge, defined as an ambulatory visit (PHC clinic or hospital  
158 out-patient) within 30 days of hospital discharge.
- 159 • Repeat psychiatric hospital admission, at any hospital level, within 30 and 90 days from the date  
160 of discharge

161 All admissions discharged by 31 December 2022 were included in this analysis (the data set was pulled  
162 on 15 March 2023, allowing sufficient time for the outcomes to have occurred and been captured  
163 electronically), except for the outcome of readmissions within 90 days, where only admissions  
164 discharged by 30 November 2022 be included.

165



166 Mixed effects logistic regression is used, as individuals often have repeated admissions over time and  
167 there is non-independence of observations. An alternative approach of using standard logistic  
168 regression, but including only the latest admission for an individual, was also performed. All analyses are  
169 stratified by hospital level (district/acute and specialized) and adjusted for:

- 170 • Age and sex
- 171 • Broad diagnosis category - based on primary discharge diagnosis ICD-10 coding: mood  
172 disorders, including both uni- and bipolar depression (F30-F39); schizophrenia and other  
173 psychotic disorders (F20-F29); substance related disorders (F10-F19); and other diagnoses
  - 174 ○ As the coding at specialized hospitals is more detailed, having a substance related  
175 diagnosis listed anywhere on the discharge summary (i.e., not just the primary  
176 diagnosis) was also included
- 177 • Index psychiatric admission or a known previous psychiatric admission, according to the  
178 available Clinicom data. Hospitals started using Clinicom at different times from 2001, with the  
179 psychiatric hospitals starting in 2008. Index admission data may not be available electronically  
180 for patients with longstanding psychiatric disorders
- 181 • PHC visit in year preceding admission or not
- 182 • Length of hospital stay,
- 183 • Admission year
- 184 • Admitting hospital
  - 185 ○ The three specialized hospitals, labelled as A, B and C
  - 186 ○ The district/acute hospitals grouped into rural regional or district hospitals, and the  
187 metropolitan hospitals grouped according to their specialized hospital catchment area  
188 (A, B or C)

189

190

191 Ethics

192 This study was approved by the University of Cape Town Health Research Ethics Committee (HREC 058  
193 /2023). Informed consent was waived for this secondary analysis of de-identified data.

194

195 Results

196 *General trends in increasing admission numbers*

197 Psychiatric admissions in the province have increased markedly over the last eight years (Figure 1a). In  
198 2015 there were 6 013 admissions in specialized hospitals and 10 991 admissions in district/acute  
199 hospitals. This increased to 6 697 and 19 880 admissions respectively in 2022. Admissions in  
200 district/acute level hospitals almost doubled during this period, while specialized hospitals only  
201 increased slightly.

202 2020 was the only year where an increase in admissions was not seen. For district/acute admissions  
203 (Figures 1b), we can see a large decrease in admission numbers coinciding with the first wave of COVID-  
204 19 infections in the province in mid-2020, followed by smaller decreases with the second (December  
205 2020 – January 2021) and third waves (mid-2021).

206 Figure 2b illustrates the primary discharge diagnosis in specialized hospitals for general acute psychiatry,  
207 where schizophrenia and other psychotic disorders make up more than half the primary diagnoses, with  
208 mood disorders contributing to less than 20% of admissions. Substance related disorders as the primary  
209 discharge diagnosis has increased as a proportion from 15.96% in 2018 to 22.47% in 2022. When looking

210 at all diagnosis codes listed (i.e., not just the primary diagnosis code) (Figure 2d), substance related  
211 diagnoses also increased proportionately with time, accounting for 45.84% of all admissions in 2022.

212

213 Diagnostic coding is not as detailed or complete at district/acute hospitals, although this has improved  
214 with time – as illustrated by the initially large number of diagnoses that fell into the “Other” category.

215 But a similar trend can be seen at these hospitals (Figures 2a and 2c), where substance related disorders  
216 now make up 22.74% of all primary diagnoses in 2022, and 29.21% of all admissions have a substance

217 related diagnosis listed in 2022. While the proportion that were substance related increased over time,

218 so did the total absolute number of patients too, meaning that the 12.71% of patients with any

219 substance related diagnosis code in 2015 corresponded to 1 396 individuals and the 29.21% of patients

220 in 2022 corresponded to 5 613 individuals.

221 The readmission rate has, however, remained relatively stable, with around 10% of admissions, resulting  
222 in a psychiatric readmission in the next 30 days (Figure 3), and this increases to around 18-19% at 90

223 days. But with the absolute number of psychiatric hospital admissions increasing, so too have the

224 absolute number of readmissions putting the limited beds available under pressure. Currently only

225 47.5% of admissions acute/district hospitals and 28.68% of admissions to specialised hospitals are first

226 known psychiatric admissions. Amongst those known with to have a previous psychiatric admission, the

227 median number of days between admissions decreased between 2018 to 2022, for both hospital levels.

228

229

230 *Profile of admitted patients and outcomes after discharge*

231 Male patients account for 62.15% of all psychiatric admissions in the province. Male patients and those  
232 with a primary substance related disorder tended to be younger (Supplementary Figure 1).

233 In 2022, the median length of stay in district/acute hospitals was 7 days and for specialized hospitals 34  
234 days. In district/acute hospitals, those awaiting referral required an additional week of admission  
235 (Supplementary Figure 2a). With increasing numbers of admissions at the district/acute level, a  
236 decreasing proportion were referred on for specialist care. In 2015, 37.54% were referred on, while in  
237 2022 only 27.08% were referred on. Length of stay at specialised hospitals was related to discharge  
238 diagnosis (Supplementary Figure 2b). Schizophrenia and other psychotic disorders had the highest  
239 lengths of stay, followed by mood disorders and then substance related disorders. All diagnosis  
240 categories showed a decrease in length of stay for 2022.

241

242 A median of 12 and 16 days were taken to first contact with the health system after discharge from  
243 district/acute hospitals and specialized hospitals, respectively. For those discharged directly from a  
244 district/acute hospital in 2022, 53.2% of individuals had an clinic/out-patient visit within 30 days, a  
245 number which has been increasing slowly over the last few years (Figure 4a). An additional 10.43% do  
246 make contact with out-patient services but take >30 days after discharge. 8.37% of discharges only make  
247 contact with the health system again with their next admission and 28.0% have had no further contact  
248 with the health system (as of March 2023, when this dataset was extracted). A similar trend is seen at  
249 specialized hospitals, although a higher proportion are followed up at ambulatory services within 30  
250 days – 65.4% in 2022 (Figure 4b). But around 20% of patients discharged from specialized psychiatric  
251 service have no further contact with the health system.

252

253 *PHC visits before a psychiatric admission*

254 In 2022, 39.4% of admitted patients had not been seen at a PHC facility in the year preceding their  
255 admission, and this increased to 72.35% if one looked at the 30 days preceding an admission  
256 (Supplementary Figure 3). Since 2015 there has been a general trend of increasing PHC visits in the  
257 period before an admission. 2020, however, was the exception with the proportion of admissions with a  
258 PHC visit in the 30 days prior to admission decreasing in May to July. Despite this general increase, the  
259 median days between the last PHC visit and the psychiatric admission has remained relatively stable  
260 between 35 and 42 days (37 days in 2022).

261

#### 262 *Successful linkage to care*

263 74 728 admissions at district/acute hospitals and 30 750 admissions at specialized hospitals were  
264 included in these analyses, the detailed characteristics of which are described in Table 1.

265

266

267 At district/acute hospitals (Table 2), those with a PHC visit in the preceding year were more likely to be  
268 successfully linked to ambulatory services (adjusted Odds ratio [aOR] of 2.67 [95% confidence interval  
269 {95%CI} 2.58-2.77]). Women were also more likely to be successfully linked to care, as were older  
270 patients and those without a primary substance related disorder. At specialized hospitals (Table 3)  
271 similar trends were seen, bearing in mind the slightly different categorization of diagnoses and lengths  
272 of stay. Those with a PHC visit in the year prior to admission (aOR 2.07 [95%CI 1.93-2.22]) and women  
273 (aOR 1.14 [95%CI 1.05-1.23]) were more likely to be successfully linked to care, but increasing age and  
274 previous psychiatric admissions were not associated with improved linkage to care.

275

276 *Risk factors for readmission*

277 At district/acute hospitals, female sex, older ages, being admitted to a rural hospital and a primary  
278 substance related diagnosis were associated with a lower risk of readmission. An increasing length of  
279 stay (but only up until 28 days), previous psychiatric admissions and a PHC visit in the year preceding an  
280 admission were risk factors for readmission. While the aORs for admission years decreased with time, a  
281 relative increase was seen in 2021, although 2022 has seen a return to aORs of pre-pandemic years.  
282 Successful linkage to care decreased the risk of readmission by 31% (aOR = 0.69 [95%CI 0.65-0.72]) and  
283 24% (aOR = 0.76 [0.73-0.79]) for readmissions within 30 and 90 days respectively.

284 At specialized hospitals, successful linkage to care within 30 days of discharge was the most protective  
285 factor against readmission within 30 and 90 days, with an aOR of 0.37 (95%CI 0.32-0.43) and 0.49 (0.44-  
286 0.55) respectively. Sex was not associated with readmission but a primary diagnosis that was substance  
287 related had the lowest association with readmission. Previous admissions were strongly associated with  
288 readmissions, as well as a PHC visit in the preceding year and being a direct admission to a specialized  
289 hospital (i.e., patients not transferred from a district/acute hospital), although the latter two factors only  
290 to a lesser degree. Longer lengths of stay were also protective of readmission, although the aOR for 60-  
291 90 days and  $\geq 90$  days similar. There was no clear trend for admission years.

292 The alternative approach of using standard logistic regression on only the latest hospital admission for  
293 an individual found similar results (Supplementary Table 1 and 2).

294

295 Discussion

296 The main finding of this study is that a high proportion individuals who require psychiatric hospital  
297 admission, are not routinely attending at ambulatory services, both before and after the admission,

298 suggesting that opportunities to avert psychiatric hospital admissions and readmissions are being  
299 missed. Substance related disorders are contributing to not only the increase in admission numbers  
300 being seen, but once an individual is discharged home, those with a substance related disorder are less  
301 likely to successfully link to ambulatory services.

302

303 While COVID-19 and its after effects are likely contributing to the current increase in psychiatric  
304 admissions, it must be highlighted that the trend of increasing admissions, particularly at the  
305 district/acute level, was already established prior to 2020, implying that other factors, such as  
306 increasing poverty, inequality, substance use and trauma/violence, could be driving this increase (18).  
307 Food insecurity and neighborhood level deprivation were found to be associated with depression,  
308 suggesting that structural poverty was contributing to the burden of mental illness in the South Africa  
309 (5,6). A study conducted in Lentegeur Hospital in 2016 found that 62% of patients, and 73% of male  
310 patients, used substances prior to their admission, with cannabis and methamphetamine being most  
311 commonly used (7). While the substance rates we found were lower, they were dependent on clinician  
312 ICD-10 coding, which is often not detailed enough, especially at the district/acute hospital level.

313 Increased admission numbers can also be related to increased access to in-patient health services,  
314 particularly in settings where out-patient services are limited. The district/acute hospitals with the  
315 highest number of psychiatric admissions in 2022 were the new large district hospitals of Mitchells Plain  
316 and Khayelitsha, which opened in 2013 and 2012 respectively. And the increasing size of the general  
317 population over time should also not be forgotten (18). Admission numbers at specialized hospitals,  
318 however, showed only a muted increase in numbers, in line with provincial policy which preferentially  
319 funded the expansion of beds at the district/acute level (Circular H18/2015). According to a Provincial  
320 Database, the number of official psychiatry beds in the Cape Town Metro was 417 in 2022 (a 136%

321 increase from 2015), while the three specialized hospitals only increased by 11% in the same time  
322 period, to 1 527 beds in 2022.

323 24% of mental health inpatients nationally are being readmitted to hospital within three months of  
324 being discharged (14). Our study found slightly lower rates of 18-19% within 3 months, and no increase  
325 in the readmission rate, except for the relative increase in district/acute hospitals in 2021, although with  
326 rising absolute numbers of admissions this might still change. Scarcity of in-patient psychiatric beds can  
327 result in premature discharge policies, where patients are discharged home before full recovery, leading  
328 to an increased risk of readmission (19). Our analysis showed that shorter lengths of stay were  
329 associated with an increased risk of readmission at specialized hospitals, but up to a certain point only,  
330 with lengths of stay above 90 days not decreasing the risk of readmission. Interestingly longer lengths of  
331 stay at district/acute hospitals were associated with an increased risk of readmission, possibly  
332 suggesting that these patients might benefit from specialized care. At the same time direct admissions  
333 to specialized hospitals had higher aORs for readmission, highlighting the importance of patients being  
334 managed at the appropriate level of care.

335  
336 In 2022, 40% of admitted psychiatric patients had not been seen at PHC facility in the preceding year (a  
337 small proportion of these patients might still be in care, if they are being followed up by private  
338 facilities, hospital out-patient departments, or community health workers). The assumption that if these  
339 patients were regularly being followed up at the PHC level a hospital admission could be averted might  
340 not always be true, but by not following these patients up, we are potentially missing an opportunity to  
341 intervene. The relatively stable median days between PHC visit and psychiatric hospital admission of 35  
342 to 42 days, despite the increasing proportion of individuals visiting a PHC in the year prior to admission,



343 reiterates this. Presumably patients receive their medication for 28 days, but do not return after,  
344 resulting in an exacerbation of symptoms and admission soon after.

345 And while out-patient services were impacted by COVID-19, particularly in early 2020, a finding which is  
346 supported by data from the South African private sector (20), the overall trend was of increasing, albeit  
347 slowly, PHC use prior to admission. However, it is important to note that digitized PHC headcount data  
348 became mandatory for provincial PHC facilities in April 2020, and so at least some of the increase we are  
349 seeing is related to better electronic data capture rather than an actual change in PHC usage.

350 With regards to linkage post-discharge, male patients and those with substance related diagnoses were  
351 less likely be linked after discharge, at both hospital levels. This is in line with data from a study in  
352 patients with schizophrenia in Cape Town that found that substance use disorders were most strongly  
353 associated with non-adherence (21). Ongoing psychotic symptoms, impaired insight and involvement  
354 with the criminal justice system have been found to be barriers to engagement with ambulatory services  
355 (22). Those with longer hospital admissions were also more likely to be successfully linked to care,  
356 possibly reflecting that those individuals have more severe disease and/or that during the longer  
357 hospital stay more time was put into preparing post-discharge care. Later admission years were  
358 associated with more successful linkage to care, although improving electronic PHC headcount data  
359 might be biasing this as well.

360

361 Successful linkage to care after discharge was one of the most protective factors against readmission  
362 within 30 and 90 days, at both hospital levels. All the other covariates in these analyses are relatively  
363 fixed, with the health system having limited control over them, the exception being length of hospital  
364 stay - although with limited bed capacity this ability is also constrained. PHC visits in the year prior to  
365 admission were associated with an increased risk of readmission, possibly indicating the chronicity of

366 the underlying disease more than the subsequent health seeking behaviour. Linkage to ambulatory  
367 psychiatric services remains a challenge globally (23). And in the Western Cape, this challenge is not  
368 limited to psychiatry services only. Patients diagnosed with tuberculosis in hospital, for instance, are  
369 more likely to be lost to follow up and have higher mortality than those diagnosed at clinics (24).  
370 Effective clinical bridging strategies proposed have included communicating discharge plans to  
371 outpatient clinicians, family involvement during the hospital stay and starting outpatient programs  
372 before discharge (23).

### 373 Limitations

374 By using routinely collected electronic data, a limitation of this study is firstly that we were restricted to  
375 admitted patients only, and secondly, that we were dependent on diagnostic coding that was not always  
376 accurate or sufficiently detailed. Also because of the challenges with diagnostic coding, we could only  
377 identify patients by the admitting specialty of psychiatry, excluding psychiatric patients in Emergency  
378 Centres and those admitted to other specialties. While this will underestimate the total number of  
379 psychiatric patients in hospital, particularly for suicidal patients, the trends are still important, and the  
380 absolute numbers of patients admitted to psychiatric wards remain crucial to those services. In addition,  
381 with the expansion of electronic data use at PHC level during the study period, it is impossible to  
382 determine how much of the increase in PHC use that is related to better data capturing. Further detailed  
383 studies assessing the mental health burden at PHCs and Emergency Centres are needed.

384 For the readmission analyses, data on out-of-facility deaths and migration out of the province is not  
385 currently available at the PHDC. If after hospital discharge, an individual moves back to the family home  
386 in another province and relapses there, they will not be counted as a readmission, artificially lowering  
387 the readmission rate. And if there is differential out-migration by hospital drainage area, this would  
388 contribute to the varying facility readmission rates. Private patients also access psychiatric services in

389 the public sector, but billing information was too incomplete to be adjusted for. While the stratification  
390 of these analyses by hospital level is reasonable, it does not consider the fact that patients often move  
391 between the two levels over many years, and more comprehensive longitudinal analyses taking into  
392 account the individual patient journeys through the health system are needed.

393

#### 394 Conclusion

395 Driven by poverty and substance use, psychiatric admissions have increased markedly, particularly at the  
396 district/acute hospital level, and have been exacerbated further by the COVID-19 pandemic. While  
397 ambulatory service use before and after a psychiatric hospital admission is slowly increasing with time,  
398 more can possibly be done at that level to avert hospital admissions. Successful linkage to ambulatory  
399 services following hospital discharge is one of the most protective factors against readmission, and  
400 stronger measures need to be put in place to ensure that all individuals discharged home receive  
401 appropriate follow-up.

402

403

#### 404 Funding

405 Funding for this study was provided by the Western Cape Department of Health and Wellness, as well as  
406 by grants from the Swiss National Science Foundation (193381) and from the National Institutes of  
407 Health for the International Epidemiology Databases to Evaluate AIDS Southern Africa Collaboration  
408 (IeDEA-SA) (U01 AI069924).

409



411 References

- 412 1. Jacob N, Coetzee D. Mental illness in the Western Cape Province, South Africa: A review of the  
413 burden of disease and healthcare interventions. *South African Med J* [Internet]. 2018 Mar 1  
414 [cited 2022 Oct 7];108(3):176–80. Available from: <https://pubmed.ncbi.nlm.nih.gov/30004359/>
- 415 2. Herman AA, Stein DJ, Seedat S, Heeringa SG, Moomal H, Williams DR. The South African Stress  
416 and Health (SASH) study: 12-month and lifetime prevalence of common mental disorders. *S Afr*  
417 *Med J* [Internet]. 2009 [cited 2022 Oct 7];99(5 Pt 2):339. Available from:  
418 [/pmc/articles/PMC3191537/](https://pubmed.ncbi.nlm.nih.gov/191537/)
- 419 3. Craig A, Rochat T, Naicker SN, Mapanga W, Mtintsilana A, Dlamini SN, et al. The prevalence of  
420 probable depression and probable anxiety, and associations with adverse childhood experiences  
421 and socio-demographics: A national survey in South Africa. *Front Public Heal*. 2022 Oct  
422 28;10:4076.
- 423 4. Bradshaw D, Norman R, Schneider M. A clarion call for action based on refined DALY estimates  
424 for South Africa. *South African Med J* [Internet]. 2007 [cited 2022 Oct 7];Jun;97(6). Available  
425 from: <https://pubmed.ncbi.nlm.nih.gov/17691472/>
- 426 5. Dowdall N, Ward CL, Lund C. The association between neighbourhood-level deprivation and  
427 depression: evidence from the south african national income dynamics study. *BMC Psychiatry*  
428 [Internet]. 2017 Dec 11 [cited 2022 Oct 7];17(1). Available from:  
429 <https://pubmed.ncbi.nlm.nih.gov/29228912/>
- 430 6. Shepherd DL. Food insecurity, depressive symptoms, and the salience of gendered family roles  
431 during the COVID-19 pandemic in South Africa. *Soc Sci Med* [Internet]. 2022 May 1 [cited 2022  
432 Oct 7];301. Available from: <https://pubmed.ncbi.nlm.nih.gov/35367907/>

- 433 7. Franken H, Parker J, Allen R, Wicomb RA. A profile of adult acute admissions to Lentegeur  
434 Psychiatric Hospital, South Africa. *S Afr J Psychiatr* [Internet]. 2019 [cited 2022 Oct 7];25.  
435 Available from: <https://pubmed.ncbi.nlm.nih.gov/31616578/>
- 436 8. The Lancet Psychiatry. COVID-19 and suicide. *The Lancet Psychiatry*. 2021 Jun 1;8(6):451.
- 437 9. Kola L, Kohrt BA, Hanlon C, Naslund JA, Sikander S, Balaji M, et al. COVID-19 mental health impact  
438 and responses in low-income and middle-income countries: reimagining global mental health.  
439 *The Lancet Psychiatry* [Internet]. 2021 Jun 1 [cited 2022 Oct 6];8(6):535–50. Available from:  
440 <https://pubmed.ncbi.nlm.nih.gov/33639109/>
- 441 10. Harker N, Johnson K, Erasmus J, Myers B. COVID 19—impact on substance use treatment  
442 utilization and provision in South Africa. *Subst Abuse Treat Prev Policy* [Internet]. 2022 Dec 1  
443 [cited 2023 May 8];17(1). Available from: [/pmc/articles/PMC8892117/](https://pubmed.ncbi.nlm.nih.gov/368892117/)
- 444 11. Posel D, Oyenubi A, Kollamparambil U. Job loss and mental health during the COVID-19  
445 lockdown: Evidence from South Africa. *PLoS One* [Internet]. 2021 Mar 1 [cited 2022 Oct 6];16(3).  
446 Available from: <https://pubmed.ncbi.nlm.nih.gov/33784339/>
- 447 12. Dawood B, Tomita A, Ramlall S. “Unheard,” “uncared for” and “unsupported”: The mental health  
448 impact of Covid -19 on healthcare workers in KwaZulu-Natal Province, South Africa. *PLoS One*  
449 [Internet]. 2022 May 1 [cited 2022 Oct 6];17(5). Available from:  
450 <https://pubmed.ncbi.nlm.nih.gov/35507540/>
- 451 13. Fernandes S, Marques N, Goga L. The complexity of neuropsychiatric manifestations of COVID-19  
452 in South Africa. *S Afr Med J* [Internet]. 2022 [cited 2022 Oct 6];112(5):313–6. Available from:  
453 <https://pubmed.ncbi.nlm.nih.gov/35587242/>
- 454 14. Docrat S, Besada D, Cleary S, Daviaud E, Lund C. Mental health system costs, resources and

- 455 constraints in South Africa: a national survey. Health Policy Plan [Internet]. 2019 Nov 1 [cited  
456 2022 Oct 6];34(9):706–19. Available from:  
457 <https://academic.oup.com/heapol/article/34/9/706/5572608>
- 458 15. Western Cape Government - Health. WCGH Annual Report 2021-2022 [Internet]. 2022. Available  
459 from: [https://www.westerncape.gov.za/assets/annual\\_report\\_2021-2022.pdf](https://www.westerncape.gov.za/assets/annual_report_2021-2022.pdf)
- 460 16. Pillay AL, Barnes BR. Psychology and COVID-19: impacts, themes and way forward. South African  
461 J Psychol. 2020(2):148–53.
- 462 17. Boulle A, Heekes A, Tiffin N, Smith M, Mutemaringa T, Zinyakatira N, et al. Data centre profile:  
463 The provincial health data centre of the western cape province, South Africa. Int J Popul Data Sci.  
464 2019 Nov 20;4(2).
- 465 18. Western Cape Government. Socio-economic profile - City of Cape Town 2021 [Internet]. 2021.  
466 Available from: <https://www.westerncape.gov.za/provincial-treasury/files/atoms/files/SEP-LG>  
467 2021 - City of Cape Town.pdf
- 468 19. Coetzee D, Koen L, Niehaus D, Botha U. Descriptive outcomes for a cohort of high-frequency  
469 psychiatric service users in the Western Cape, South Africa after 10 years. S Afr J Psychiatr  
470 [Internet]. 2022 [cited 2022 Oct 7];28:5. Available from:  
471 <https://pubmed.ncbi.nlm.nih.gov/35747340/>
- 472 20. Wettstein A, Tlali M, Joska JA, Cornell M, Skrivankova VW, Seedat S, et al. The effect of the  
473 COVID-19 lockdown on mental health care use in South Africa: an interrupted time-series  
474 analysis. Epidemiol Psychiatr Sci [Internet]. 2022 Jun 15 [cited 2022 Oct 6];31. Available from:  
475 <https://pubmed.ncbi.nlm.nih.gov/35703078/>
- 476 21. Benelmokhtar JM, Chiliza B, Phahladira L, Emsley R, Asmal L. Factors associated with dropout at 2

- 477 years post-initiation of treatment in the first episode of schizophrenia. *S Afr J Psychiatr* [Internet].  
478 2021 [cited 2023 May 8];27. Available from: <https://pubmed.ncbi.nlm.nih.gov/33824760/>
- 479 22. Compton MT. Barriers to initial outpatient treatment engagement following first hospitalization  
480 for a first episode of nonaffective psychosis: a descriptive case series. *J Psychiatr Pract* [Internet].  
481 2005 Jan [cited 2023 May 8];11(1):62–9. Available from:  
482 <https://pubmed.ncbi.nlm.nih.gov/15650625/>
- 483 23. Boyer CA, McAlpine DD, Pottick KJ, Olfson M. Identifying risk factors and key strategies in linkage  
484 to outpatient psychiatric care. *Am J Psychiatry* [Internet]. 2000 [cited 2023 May 8];157(10):1592–  
485 8. Available from: <https://pubmed.ncbi.nlm.nih.gov/11007712/>
- 486 24. Osman M, Meehan SA, von Delft A, Du Preez K, Dunbar R, Marx FM, et al. Early mortality in  
487 tuberculosis patients initially lost to follow up following diagnosis in provincial hospitals and  
488 primary health care facilities in Western Cape, South Africa. *PLoS One* [Internet]. 2021 Jun 1  
489 [cited 2023 Mar 26];16(6):e0252084. Available from:  
490 <https://journals.plos.org/plosone/article?id=10.1371/journal.pone.0252084>

491

492



493 **Figure 1: Psychiatric hospital admissions in the Western Cape 2015-2022 - annual admissions for all facilities (1a)**  
494 **and 14 day moving average of psychiatric admissions at acute/district hospital level 2015-2022 (1b).**

495

496 **Figure 2: Discharge diagnosis trends for acute/district hospitals (2a) and specialized hospitals (2b), based on the**  
497 **primary discharge diagnosis. The proportion of admissions that had any substance related ICD-10 code listed at**  
498 **acute/district hospitals (2c) and specialized hospitals (2d).**

499

500 **Figure 3: Readmission rates for district/acute and specialized hospitals 2018-2022 - readmission within 30 days**  
501 **(3a), 90 days (3b), readmission categories (3c) and median days between psychiatric admissions (3d).**

502

503

504 **Figure 4: After discharge from hospital, the clinic or out-patient contact within 30 days is assessed at**  
505 **acute/district hospitals (4a) and specialized hospitals (4b). “Yes” is defined as an ambulatory (clinic or out-**  
506 **patient) visit within 30 days, while “No” is an ambulatory visit but at more than 30 days.**

507

508

509 **Supplementary Figure 1: Median age in years of admitted psychiatric patients by diagnosis category and sex, in**  
510 **all facilities in the Western Cape 2015-2022.**

511

512 **Supplementary Figure 2: Median length of stay (LOS) in days for acute/district admissions (2a), by destination**  
513 **category (discharged directly home vs transferred on for specialized care), and LOS for specialized hospitals by**  
514 **diagnosis category (2b)**

515

516 **Supplementary Figure 3: Primary health care visits preceding an district/acute psychiatric hospital admission:**  
517 **proportion of admissions with a PHC visit in the 30 days prior to admission, in 31-365 days prior admission and**  
518 **those without a PHC visit, for 2015-2022 (3a), and proportion of admissions with a PHC visit in the 30 days prior**  
519 **to admission in January 2020 – December 2021 (3b).**

520

521

522

**Table 1: Detailed characteristics of included admissions, stratified according to hospital level**

|                                           |                                     | District/acute |       | Specialized |       |
|-------------------------------------------|-------------------------------------|----------------|-------|-------------|-------|
|                                           |                                     | n = 74 432     |       | n = 30 214  |       |
|                                           |                                     | n              | %     | n           | %     |
| <b>Sex</b>                                | Male                                | 45159          | 60.67 | 19971       | 66.10 |
|                                           | Female                              | 29273          | 39.33 | 10243       | 33.90 |
| <b>Age category</b>                       | 18-29 years                         | 31905          | 42.87 | 13437       | 44.48 |
|                                           | 30-39 years                         | 20481          | 27.52 | 9272        | 30.69 |
|                                           | 40-49 years                         | 11181          | 15.02 | 4555        | 15.08 |
|                                           | ≥50 years                           | 10850          | 14.58 | 2948        | 9.76  |
| <b>Diagnostic categories</b>              | Substance related                   | 15140          | 20.34 | 6077        | 20.11 |
|                                           | Schizophrenia                       | 21653          | 29.09 | 16688       | 55.23 |
|                                           | Mood disorders                      | 11058          | 14.86 | 5919        | 19.59 |
|                                           | Other                               | 26581          | 35.71 | 1530        | 5.06  |
|                                           | Primary substance related diagnosis | 15140          | 20.34 | 6077        | 20.11 |
|                                           | Schizophrenia with any substance    | 2905           | 3.90  | 4636        | 15.34 |
|                                           | Mood/other with any substance       | 2007           | 2.70  | 1396        | 4.62  |
|                                           | Schizophrenia without any substance | 18748          | 25.19 | 12052       | 39.89 |
|                                           | Mood/other without any substance    | 35632          | 47.87 | 6053        | 20.03 |
| <b>Previous admissions</b>                | Index admission                     | 37677          | 50.62 | 8340        | 27.60 |
|                                           | ≥1 previous admissions              | 36755          | 49.38 | 21874       | 72.40 |
| <b>PHC visit in year before admission</b> | No                                  | 31531          | 42.36 | 11286       | 37.35 |
|                                           | Yes                                 | 42901          | 57.64 | 18928       | 62.65 |
| <b>Length of stay</b>                     | 1-3 days                            | 17826          | 23.95 |             |       |
|                                           | 4-6 days                            | 17421          | 23.41 |             |       |
|                                           | 7-13 days                           | 18167          | 24.41 |             |       |
|                                           | 14-27 days                          | 13995          | 18.80 |             |       |
|                                           | ≥28 days                            | 7023           | 9.44  |             |       |
|                                           |                                     | 1-13 days      |       |             | 1717  |
|                                           | 14-29 days                          |                |       | 8575        | 28.38 |
|                                           | 30-59 days                          |                |       | 12138       | 40.17 |
|                                           | 60-89 days                          |                |       | 4161        | 13.77 |
|                                           | ≥90 days                            |                |       | 3623        | 11.99 |

|                                              |                         |       |       |       |       |
|----------------------------------------------|-------------------------|-------|-------|-------|-------|
| <b>Admission year</b>                        | 2015                    | 5945  | 7.99  | 3500  | 11.58 |
|                                              | 2016                    | 7132  | 9.58  | 3573  | 11.83 |
|                                              | 2017                    | 8149  | 10.95 | 3321  | 10.99 |
|                                              | 2018                    | 9080  | 12.20 | 3451  | 11.42 |
|                                              | 2019                    | 9915  | 13.32 | 3824  | 12.66 |
|                                              | 2020                    | 9376  | 12.60 | 3820  | 12.64 |
|                                              | 2021                    | 11966 | 16.08 | 4383  | 14.51 |
|                                              | 2022                    | 12869 | 17.29 | 4342  | 14.37 |
| <b>Admitting hospital</b>                    | Metro Catchment A       | 20502 | 27.54 |       |       |
|                                              | Metro Catchment B       | 10674 | 14.34 |       |       |
|                                              | Metro Catchment C       | 17273 | 23.21 |       |       |
|                                              | Rural hospitals         | 25983 | 34.91 |       |       |
| <b>Outpatient linkage to care &lt;30days</b> | Specialized hospital A  |       |       | 8702  | 28.80 |
|                                              | Specialized hospital B  |       |       | 8859  | 29.32 |
|                                              | Specialized hospital C  |       |       | 12653 | 41.88 |
|                                              | No                      | 36381 | 48.88 | 9586  | 31.73 |
|                                              | Yes                     | 38051 | 51.12 | 20628 | 68.27 |
|                                              | <b>Direct admission</b> | No    |       |       | 24770 |
|                                              | Yes                     |       |       | 5444  | 18.02 |

523

524

525  
526  
527

**Table 2: Mixed effects logistic regression for the outcome of successful linkage to care following discharge (i.e., a clinic or out-patient visit within 30 days of hospital discharge) and psychiatric readmissions within 30 and 90 days for district/acute hospitals. Only patients discharged directly home are included in these analyses.**

|                                           |                        | District/acute hospitals                           |        |      |                                                |        |      |                                                |        |      |
|-------------------------------------------|------------------------|----------------------------------------------------|--------|------|------------------------------------------------|--------|------|------------------------------------------------|--------|------|
|                                           |                        | Successful linkage to outpatient services <30 days |        |      | Repeat psychiatric hospital admission <30 days |        |      | Repeat psychiatric hospital admission <90 days |        |      |
|                                           |                        | n = 74 400                                         |        |      | n = 74 400                                     |        |      | n = 73 183                                     |        |      |
|                                           |                        | n = 47 153                                         |        |      | n = 47 153                                     |        |      | n = 46 508                                     |        |      |
|                                           |                        | aOR                                                | 95% CI |      | aOR                                            | 95% CI |      | aOR                                            | 95% CI |      |
| <b>Sex</b>                                | Male                   | Ref                                                |        |      | Ref                                            |        |      | Ref                                            |        |      |
|                                           | Female                 | 1.10                                               | 1.06   | 1.14 | 0.94                                           | 0.89   | 1.00 | 0.89                                           | 0.85   | 0.94 |
| <b>Age category</b>                       | 18-29 years            | Ref                                                |        |      | Ref                                            |        |      | Ref                                            |        |      |
|                                           | 30-39 years            | 1.03                                               | 0.99   | 1.08 | 0.82                                           | 0.76   | 0.87 | 0.86                                           | 0.81   | 0.90 |
|                                           | 40-49 years            | 1.22                                               | 1.15   | 1.28 | 0.79                                           | 0.73   | 0.86 | 0.85                                           | 0.79   | 0.90 |
|                                           | 50-59 years            | 1.28                                               | 1.21   | 1.35 | 0.75                                           | 0.69   | 0.82 | 0.80                                           | 0.75   | 0.86 |
| <b>Primary diagnosis</b>                  | Substance related      | Ref                                                |        |      | Ref                                            |        |      | Ref                                            |        |      |
|                                           | Schizophrenia          | 1.23                                               | 1.17   | 1.30 | 1.26                                           | 1.17   | 1.36 | 1.28                                           | 1.20   | 1.36 |
|                                           | Mood disorders         | 1.43                                               | 1.34   | 1.52 | 1.29                                           | 1.18   | 1.41 | 1.16                                           | 1.07   | 1.25 |
|                                           | Other                  | 1.19                                               | 1.13   | 1.25 | 1.02                                           | 0.95   | 1.10 | 0.93                                           | 0.88   | 0.99 |
| <b>Previous admissions</b>                | Index admission        | Ref                                                |        |      | Ref                                            |        |      | Ref                                            |        |      |
|                                           | ≥1 previous admissions | 1.10                                               | 1.06   | 1.15 | 1.97                                           | 1.86   | 2.09 | 2.46                                           | 2.35   | 2.58 |
| <b>PHC visit in year before admission</b> | No                     | Ref                                                |        |      | Ref                                            |        |      | Ref                                            |        |      |
|                                           | Yes                    | 2.67                                               | 2.58   | 2.77 | 1.11                                           | 1.05   | 1.18 | 1.18                                           | 1.13   | 1.24 |
| <b>Length of stay</b>                     | 1-3 days               | Ref                                                |        |      | Ref                                            |        |      | Ref                                            |        |      |
|                                           | 4-6 days               | 1.36                                               | 1.29   | 1.43 | 1.33                                           | 1.23   | 1.43 | 1.26                                           | 1.18   | 1.35 |
|                                           | 7-13 days              | 1.69                                               | 1.61   | 1.78 | 1.47                                           | 1.36   | 1.59 | 1.39                                           | 1.30   | 1.48 |

|                                              |                           |                   |      |      |      |      |      |      |      |      |
|----------------------------------------------|---------------------------|-------------------|------|------|------|------|------|------|------|------|
|                                              | 14-27 days                | 2.00              | 1.89 | 2.11 | 1.23 | 1.13 | 1.34 | 1.18 | 1.10 | 1.27 |
|                                              | ≥28 days                  | 2.33              | 2.17 | 2.49 | 0.81 | 0.73 | 0.91 | 0.83 | 0.76 | 0.91 |
| <b>Admission year</b>                        | 2015                      | Ref               |      |      | Ref  |      |      | Ref  |      |      |
|                                              | 2016                      | 1.03              | 0.95 | 1.12 | 0.93 | 0.83 | 1.04 | 0.91 | 0.83 | 1.00 |
|                                              | 2017                      | 1.10              | 1.02 | 1.19 | 0.88 | 0.79 | 0.99 | 0.88 | 0.80 | 0.96 |
|                                              | 2018                      | 1.10              | 1.02 | 1.19 | 0.87 | 0.78 | 0.97 | 0.86 | 0.78 | 0.94 |
|                                              | 2019                      | 1.10              | 1.02 | 1.18 | 0.77 | 0.68 | 0.86 | 0.79 | 0.72 | 0.87 |
|                                              | 2020                      | 1.11              | 1.03 | 1.20 | 0.77 | 0.69 | 0.86 | 0.77 | 0.70 | 0.85 |
|                                              | 2021                      | 1.18              | 1.09 | 1.27 | 0.83 | 0.74 | 0.92 | 0.86 | 0.79 | 0.95 |
|                                              | 2022                      | 1.24              | 1.16 | 1.34 | 0.78 | 0.70 | 0.86 | 0.80 | 0.73 | 0.88 |
|                                              | <b>Admitting hospital</b> | Metro Catchment A | Ref  |      |      | Ref  |      |      | Ref  |      |
| Metro Catchment B                            |                           | 1.02              | 0.96 | 1.08 | 0.93 | 0.86 | 1.02 | 0.87 | 0.81 | 0.93 |
| Metro Catchment C                            |                           | 1.00              | 0.95 | 1.05 | 0.91 | 0.85 | 0.98 | 0.91 | 0.86 | 0.97 |
| Rural hospitals                              |                           | 0.96              | 0.92 | 1.01 | 0.79 | 0.74 | 0.85 | 0.72 | 0.68 | 0.76 |
| <b>Outpatient linkage to care &lt;30days</b> | No                        |                   |      |      | Ref  |      |      | Ref  |      |      |
|                                              | Yes                       |                   |      |      | 0.69 | 0.65 | 0.72 | 0.76 | 0.73 | 0.80 |

528

529

530  
531

**Table 3: Mixed effects logistic regression for the outcome of successful linkage to care following discharge (i.e., a clinic or out-patient visit within 30 days of hospital discharge) and psychiatric readmissions within 30 and 90 days for specialized hospitals.**

|                                              |                                     | Specialized hospitals                     |        |      |                                                  |        |      |                                                  |        |      |
|----------------------------------------------|-------------------------------------|-------------------------------------------|--------|------|--------------------------------------------------|--------|------|--------------------------------------------------|--------|------|
|                                              |                                     | Successful linkage to outpatient services |        |      | Repeat psychiatric hospital admission in 30 days |        |      | Repeat psychiatric hospital admission in 90 days |        |      |
| Admissions                                   |                                     | n = 30 209                                |        |      | n = 30 209                                       |        |      | n = 29 767                                       |        |      |
| Individuals                                  |                                     | n = 17 214                                |        |      | n = 17 214                                       |        |      | n = 17 015                                       |        |      |
|                                              |                                     | aOR                                       | 95% CI |      | aOR                                              | 95% CI |      | aOR                                              | 95% CI |      |
| <b>Sex</b>                                   | Male                                | Ref                                       |        |      | Ref                                              |        |      | Ref                                              |        |      |
|                                              | Female                              | 1.16                                      | 1.08   | 1.25 | 1.03                                             | 0.91   | 1.16 | 0.91                                             | 0.83   | 1.00 |
| <b>Age category</b>                          | 18-29 years                         | Ref                                       |        |      | Ref                                              |        |      | Ref                                              |        |      |
|                                              | 30-39 years                         | 0.88                                      | 0.82   | 0.95 | 0.90                                             | 0.80   | 1.02 | 1.04                                             | 0.94   | 1.14 |
|                                              | 40-49 years                         | 0.93                                      | 0.85   | 1.03 | 0.76                                             | 0.65   | 0.90 | 0.99                                             | 0.87   | 1.12 |
|                                              | 50-59 years                         | 1.11                                      | 0.98   | 1.24 | 0.93                                             | 0.77   | 1.12 | 1.15                                             | 0.99   | 1.33 |
| <b>Diagnostic categories</b>                 | Primary substance related diagnosis | Ref                                       |        |      | Ref                                              |        |      | Ref                                              |        |      |
|                                              | Schizophrenia with any substance    | 1.05                                      | 0.95   | 1.16 | 1.38                                             | 1.15   | 1.65 | 1.42                                             | 1.23   | 1.63 |
|                                              | Mood/other with any substance       | 0.97                                      | 0.84   | 1.13 | 1.40                                             | 1.08   | 1.80 | 1.53                                             | 1.26   | 1.87 |
|                                              | Schizophrenia without any substance | 1.12                                      | 1.03   | 1.22 | 1.28                                             | 1.10   | 1.49 | 1.37                                             | 1.21   | 1.54 |
|                                              | Mood/other without any substance    | 1.24                                      | 1.13   | 1.38 | 1.53                                             | 1.29   | 1.81 | 1.36                                             | 1.19   | 1.56 |
| <b>Previous admissions</b>                   | Index psychiatric admission         | Ref                                       |        |      | Ref                                              |        |      | Ref                                              |        |      |
|                                              | ≥1 previous admissions              | 0.89                                      | 0.83   | 0.95 | 2.04                                             | 1.78   | 2.35 | 2.39                                             | 2.15   | 2.67 |
| <b>PHC visits in year prior to admission</b> | No                                  | Ref                                       |        |      | Ref                                              |        |      | Ref                                              |        |      |
|                                              | Yes                                 | 2.05                                      | 1.93   | 2.18 | 1.30                                             | 1.17   | 1.45 | 1.39                                             | 1.28   | 1.52 |

|                                               |                        |      |      |      |      |      |      |      |      |      |
|-----------------------------------------------|------------------------|------|------|------|------|------|------|------|------|------|
| <b>Length of stay</b>                         | 1-13 days              | Ref  |      |      | Ref  |      |      | Ref  |      |      |
|                                               | 14-29 days             | 1.16 | 1.02 | 1.32 | 0.68 | 0.57 | 0.82 | 0.81 | 0.69 | 0.95 |
|                                               | 30-59 days             | 1.27 | 1.12 | 1.44 | 0.51 | 0.43 | 0.62 | 0.63 | 0.54 | 0.73 |
|                                               | 60-89 days             | 1.36 | 1.18 | 1.57 | 0.39 | 0.31 | 0.49 | 0.53 | 0.44 | 0.63 |
|                                               | ≥90 days               | 1.57 | 1.35 | 1.83 | 0.39 | 0.31 | 0.49 | 0.53 | 0.44 | 0.63 |
| <b>Admission year</b>                         | 2015                   | Ref  |      |      | Ref  |      |      | Ref  |      |      |
|                                               | 2016                   | 1.11 | 0.99 | 1.24 | 0.95 | 0.78 | 1.14 | 0.89 | 0.77 | 1.04 |
|                                               | 2017                   | 1.26 | 1.12 | 1.42 | 0.91 | 0.75 | 1.10 | 0.93 | 0.80 | 1.08 |
|                                               | 2018                   | 1.26 | 1.12 | 1.42 | 0.91 | 0.75 | 1.11 | 0.93 | 0.80 | 1.08 |
|                                               | 2019                   | 1.33 | 1.19 | 1.50 | 0.82 | 0.67 | 0.99 | 0.94 | 0.81 | 1.09 |
|                                               | 2020                   | 1.32 | 1.18 | 1.49 | 0.83 | 0.68 | 1.01 | 0.87 | 0.74 | 1.01 |
|                                               | 2021                   | 1.41 | 1.26 | 1.58 | 0.82 | 0.67 | 0.99 | 0.91 | 0.78 | 1.05 |
|                                               | 2022                   | 1.43 | 1.28 | 1.60 | 0.96 | 0.79 | 1.15 | 1.00 | 0.87 | 1.16 |
| <b>Direct admission</b>                       | No                     | Ref  |      |      | Ref  |      |      | Ref  |      |      |
|                                               | Yes                    | 0.97 | 0.90 | 1.05 | 1.15 | 1.01 | 1.30 | 1.15 | 1.04 | 1.27 |
| <b>Admitting hospital</b>                     | Specialized hospital A | Ref  |      |      | Ref  |      |      | Ref  |      |      |
|                                               | Specialized hospital B | 1.24 | 1.14 | 1.34 | 0.71 | 0.61 | 0.82 | 0.68 | 0.60 | 0.76 |
|                                               | Specialized hospital C | 1.18 | 1.09 | 1.27 | 1.03 | 0.91 | 1.17 | 0.97 | 0.87 | 1.07 |
| <b>Successful linkage to care &lt;30 days</b> | No                     |      |      |      | Ref  |      |      | Ref  |      |      |
|                                               | Yes                    |      |      |      | 0.37 | 0.33 | 0.40 | 0.45 | 0.42 | 0.49 |

532

533

534

535  
536

**Supplementary Table 1: Standard logistic regression for the outcomes of successful linkage to care and psychiatric readmission within 30 and 90 days for district/acute hospitals. Only the latest admission for an individual was included in this analysis.**

|                                           |                        | District / Acute Hospitals                         |      |      |                                                |      |      |                                                |      |      |            |  |  |
|-------------------------------------------|------------------------|----------------------------------------------------|------|------|------------------------------------------------|------|------|------------------------------------------------|------|------|------------|--|--|
|                                           |                        | Successful linkage to outpatient services <30 days |      |      | Repeat psychiatric hospital admission <30 days |      |      | Repeat psychiatric hospital admission <90 days |      |      |            |  |  |
|                                           |                        | Admissions<br>Individuals                          |      |      | n = 47 153                                     |      |      | n = 47 153                                     |      |      | n = 46 508 |  |  |
|                                           |                        | aOR                                                |      |      | 95% CI                                         |      |      | aOR                                            |      |      | 95% CI     |  |  |
| <b>Sex</b>                                | Male                   | Ref                                                |      |      | Ref                                            |      |      | Ref                                            |      |      |            |  |  |
|                                           | Female                 | 1.08                                               | 1.03 | 1.12 | 1.01                                           | 0.93 | 1.09 | 0.97                                           | 0.91 | 1.04 |            |  |  |
| <b>Age category</b>                       | 18-29 years            | Ref                                                |      |      | Ref                                            |      |      | Ref                                            |      |      |            |  |  |
|                                           | 30-39 years            | 1.07                                               | 1.02 | 1.12 | 0.83                                           | 0.75 | 0.91 | 0.81                                           | 0.75 | 0.88 |            |  |  |
|                                           | 40-49 years            | 1.25                                               | 1.18 | 1.32 | 0.79                                           | 0.71 | 0.89 | 0.85                                           | 0.77 | 0.93 |            |  |  |
|                                           | ≥50 years              | 1.29                                               | 1.21 | 1.36 | 0.75                                           | 0.65 | 0.86 | 0.73                                           | 0.66 | 0.81 |            |  |  |
| <b>Diagnostic categories</b>              | Substance related      | Ref                                                |      |      | Ref                                            |      |      | Ref                                            |      |      |            |  |  |
|                                           | Schizophrenia          | 1.27                                               | 1.19 | 1.34 | 1.27                                           | 1.14 | 1.42 | 1.26                                           | 1.15 | 1.38 |            |  |  |
|                                           | Mood disorders         | 1.47                                               | 1.37 | 1.57 | 1.27                                           | 1.11 | 1.45 | 1.19                                           | 1.07 | 1.33 |            |  |  |
|                                           | Other                  | 1.22                                               | 1.15 | 1.29 | 0.97                                           | 0.87 | 1.09 | 0.89                                           | 0.81 | 0.98 |            |  |  |
| <b>Previous admissions</b>                | Index admission        | Ref                                                |      |      | Ref                                            |      |      | Ref                                            |      |      |            |  |  |
|                                           | ≥1 previous admissions | 1.12                                               | 1.07 | 1.16 | 2.63                                           | 2.42 | 2.85 | 3.16                                           | 2.96 | 3.38 |            |  |  |
| <b>PHC visit in year before admission</b> | No                     | Ref                                                |      |      | Ref                                            |      |      | Ref                                            |      |      |            |  |  |
|                                           | Yes                    | 2.69                                               | 2.59 | 2.80 | 1.09                                           | 1.01 | 1.18 | 1.15                                           | 1.08 | 1.23 |            |  |  |
| <b>Length of stay</b>                     | 1-3 days               | Ref                                                |      |      | Ref                                            |      |      | Ref                                            |      |      |            |  |  |
|                                           | 4-6 days               | 1.37                                               | 1.30 | 1.45 | 1.47                                           | 1.30 | 1.66 | 1.42                                           | 1.29 | 1.57 |            |  |  |





539  
540

**Supplementary Table 2: Standard logistic regression for the outcomes of successful linkage to care and psychiatric readmission within 30 and 90 days for specialized hospitals. Only the latest admission for an individual was included in this analysis.**

|                                              |                                     | Specialized hospitals                     |        |      |                                                  |        |      |                                                  |        |      |
|----------------------------------------------|-------------------------------------|-------------------------------------------|--------|------|--------------------------------------------------|--------|------|--------------------------------------------------|--------|------|
|                                              |                                     | Successful linkage to outpatient services |        |      | Repeat psychiatric hospital admission in 30 days |        |      | Repeat psychiatric hospital admission in 90 days |        |      |
| Admissions                                   |                                     | 17 214                                    |        |      | 17 214                                           |        |      | 17 015                                           |        |      |
| Individuals                                  |                                     | 17 214                                    |        |      | 17 214                                           |        |      | 17 015                                           |        |      |
|                                              |                                     | aOR                                       | 95% CI |      | aOR                                              | 95% CI |      | aOR                                              | 95% CI |      |
| <b>Sex</b>                                   | Male                                | Ref                                       |        |      | Ref                                              |        |      | Ref                                              |        |      |
|                                              | Female                              | 1.14                                      | 1.05   | 1.23 | 1.05                                             | 0.89   | 1.25 | 0.94                                             | 0.83   | 1.06 |
| <b>Age category</b>                          | 18-29 years                         | Ref                                       |        |      | Ref                                              |        |      | Ref                                              |        |      |
|                                              | 30-39 years                         | 0.90                                      | 0.83   | 0.98 | 0.84                                             | 0.71   | 1.01 | 1.00                                             | 0.88   | 1.14 |
|                                              | 40-49 years                         | 0.93                                      | 0.84   | 1.03 | 0.75                                             | 0.59   | 0.94 | 1.01                                             | 0.86   | 1.19 |
|                                              | 50-59 years                         | 1.13                                      | 0.99   | 1.28 | 0.76                                             | 0.58   | 1.01 | 0.91                                             | 0.75   | 1.11 |
|                                              | ≥60 years                           |                                           |        |      |                                                  |        |      |                                                  |        |      |
| <b>Diagnostic categories</b>                 | Primary substance related diagnosis | Ref                                       |        |      | Ref                                              |        |      | Ref                                              |        |      |
|                                              | Schizophrenia with any substance    | 1.14                                      | 1.02   | 1.29 | 1.31                                             | 1.00   | 1.72 | 1.36                                             | 1.11   | 1.65 |
|                                              | Mood/other with any substance       | 1.01                                      | 0.85   | 1.21 | 1.40                                             | 0.96   | 2.05 | 1.46                                             | 1.11   | 1.93 |
|                                              | Schizophrenia without any substance | 1.12                                      | 1.02   | 1.22 | 1.06                                             | 0.86   | 1.32 | 1.22                                             | 1.04   | 1.43 |
|                                              | Mood/other without any substance    | 1.21                                      | 1.09   | 1.35 | 1.47                                             | 1.16   | 1.85 | 1.39                                             | 1.17   | 1.66 |
| <b>Previous admissions</b>                   | Index psychiatric admission         | Ref                                       |        |      | Ref                                              |        |      | Ref                                              |        |      |
|                                              | ≥1 previous admissions              | 0.93                                      | 0.86   | 0.99 | 2.18                                             | 1.82   | 2.60 | 2.73                                             | 2.39   | 3.12 |
| <b>PHC visits in year prior to admission</b> | No                                  | Ref                                       |        |      | Ref                                              |        |      | Ref                                              |        |      |
|                                              | Yes                                 | 2.07                                      | 1.93   | 2.22 | 1.33                                             | 1.14   | 1.56 | 1.40                                             | 1.25   | 1.57 |
| <b>Length of stay</b>                        | 1-13 days                           | Ref                                       |        |      | Ref                                              |        |      | Ref                                              |        |      |

|                                               |                        |      |      |      |      |      |      |      |      |      |
|-----------------------------------------------|------------------------|------|------|------|------|------|------|------|------|------|
|                                               | 14-29 days             | 1.19 | 1.03 | 1.37 | 0.70 | 0.54 | 0.92 | 0.83 | 0.67 | 1.02 |
|                                               | 30-59 days             | 1.34 | 1.17 | 1.54 | 0.53 | 0.41 | 0.70 | 0.58 | 0.47 | 0.72 |
|                                               | 60-89 days             | 1.30 | 1.11 | 1.53 | 0.36 | 0.25 | 0.51 | 0.47 | 0.37 | 0.61 |
|                                               | ≥90 days               | 1.39 | 1.18 | 1.64 | 0.41 | 0.28 | 0.58 | 0.58 | 0.45 | 0.74 |
| <b>Admission year</b>                         | 2015                   | Ref  |      |      | Ref  |      |      | Ref  |      |      |
|                                               | 2016                   | 1.09 | 0.95 | 1.24 | 0.88 | 0.65 | 1.18 | 0.93 | 0.75 | 1.16 |
|                                               | 2017                   | 1.25 | 1.09 | 1.43 | 1.08 | 0.81 | 1.45 | 0.95 | 0.76 | 1.19 |
|                                               | 2018                   | 1.23 | 1.07 | 1.41 | 0.89 | 0.65 | 1.21 | 1.01 | 0.81 | 1.26 |
|                                               | 2019                   | 1.28 | 1.12 | 1.47 | 1.04 | 0.78 | 1.39 | 1.16 | 0.94 | 1.43 |
|                                               | 2020                   | 1.23 | 1.07 | 1.40 | 0.88 | 0.66 | 1.19 | 0.95 | 0.77 | 1.18 |
|                                               | 2021                   | 1.34 | 1.18 | 1.52 | 0.69 | 0.51 | 0.94 | 0.82 | 0.66 | 1.01 |
|                                               | 2022                   | 1.40 | 1.23 | 1.59 | 0.94 | 0.71 | 1.24 | 0.96 | 0.78 | 1.18 |
| <b>Direct admission</b>                       | No                     | Ref  |      |      | Ref  |      |      | Ref  |      |      |
|                                               | Yes                    | 0.94 | 0.85 | 1.04 | 1.21 | 0.99 | 1.47 | 1.16 | 1.00 | 1.34 |
| <b>Admitting hospital</b>                     | Specialized hospital A | Ref  |      |      | Ref  |      |      | Ref  |      |      |
|                                               | Specialized hospital B | 1.13 | 1.03 | 1.24 | 0.84 | 0.68 | 1.03 | 0.75 | 0.65 | 0.87 |
|                                               | Specialized hospital C | 1.08 | 1.00 | 1.17 | 1.09 | 0.91 | 1.31 | 0.98 | 0.86 | 1.12 |
| <b>Successful linkage to care &lt;30 days</b> | No                     | Ref  |      |      | Ref  |      |      | Ref  |      |      |
|                                               | Yes                    |      |      |      | 0.37 | 0.32 | 0.43 | 0.49 | 0.44 | 0.55 |

541

542

543

Number of new admissions

Hospital level ● Specialized ● Acute

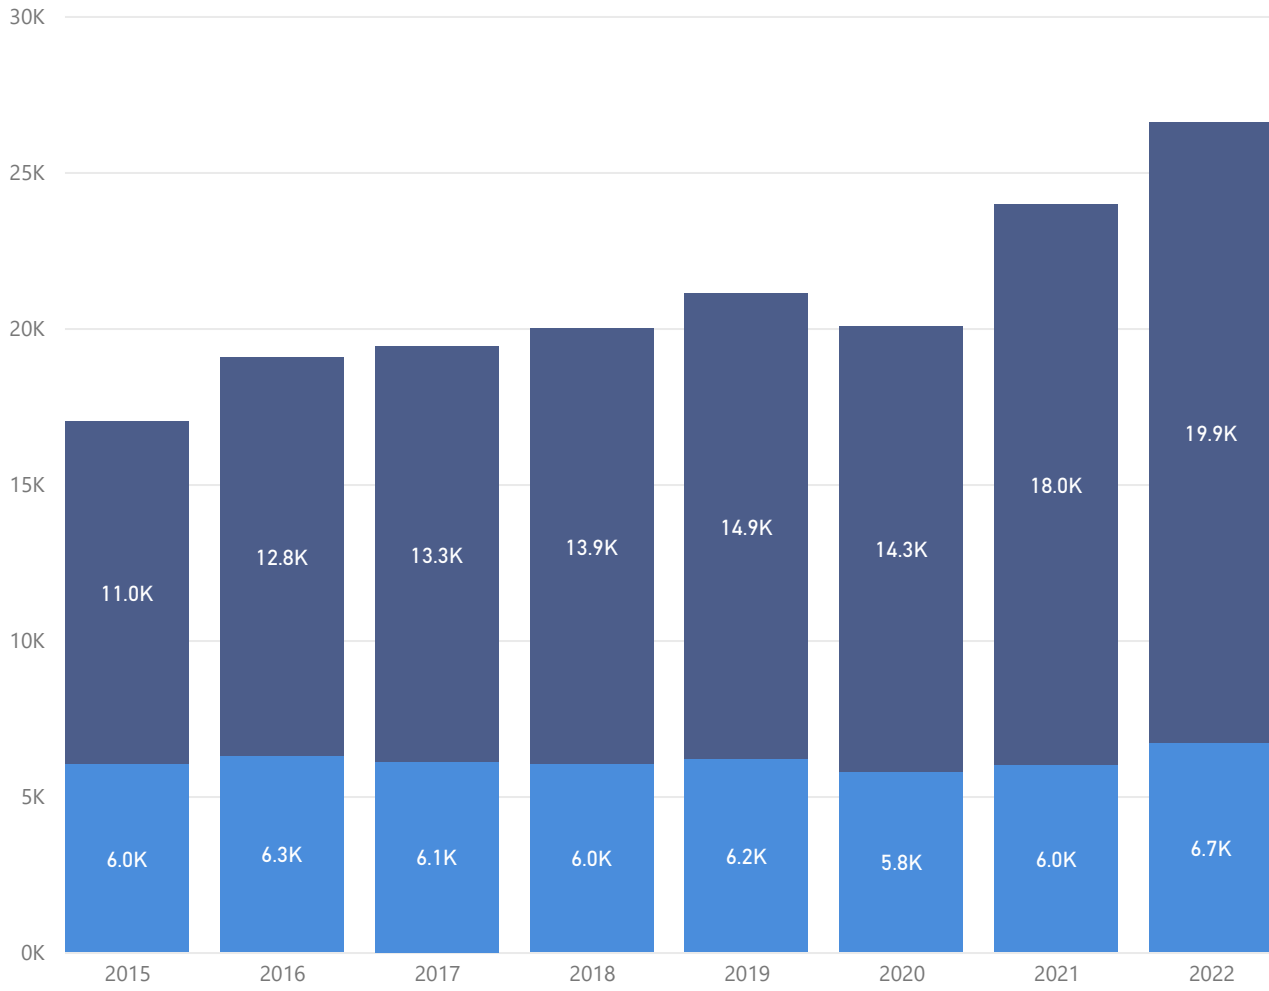

14-day moving average of daily psychiatric admissions for the province - district/acute hospitals only

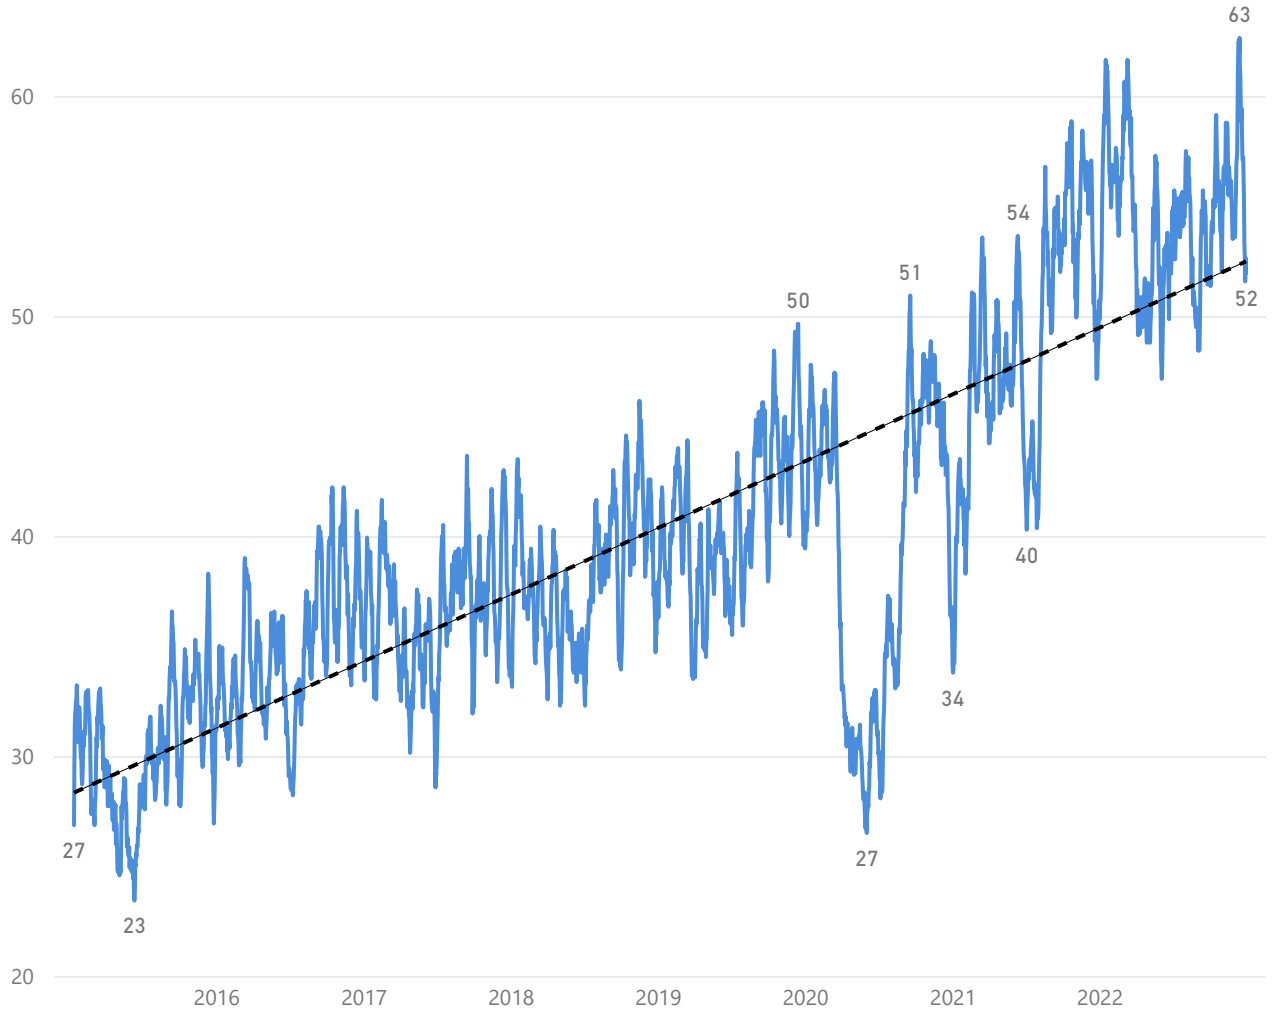

Primary discharge diagnosis in district/acute hospitals

● Mood disorders ● Other ● Schizophrenia ● Substance related

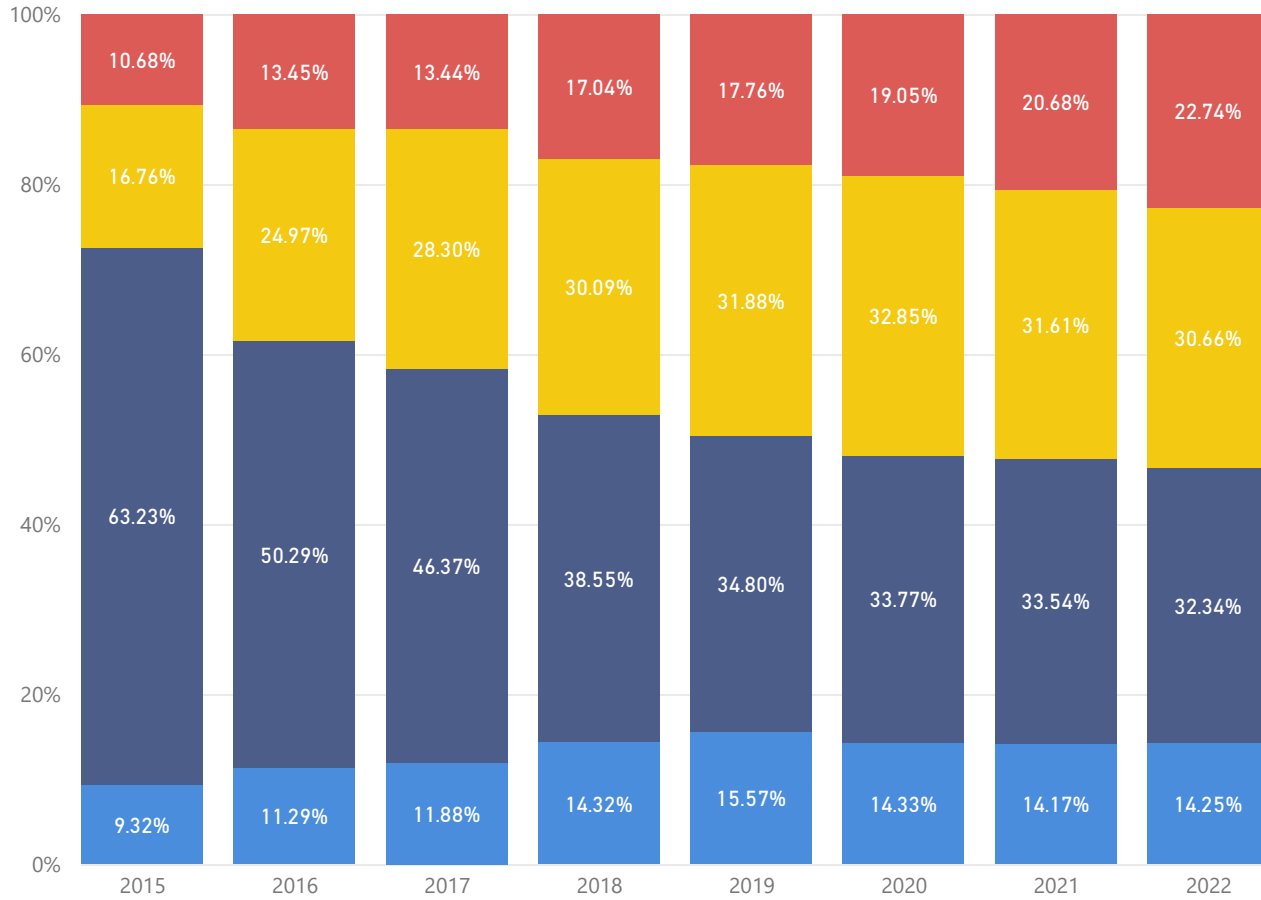

Primary discharge diagnosis in general acute psychiatry (specialized hospitals only)

● Mood disorders ● Other ● Schizophrenia ● Substance related

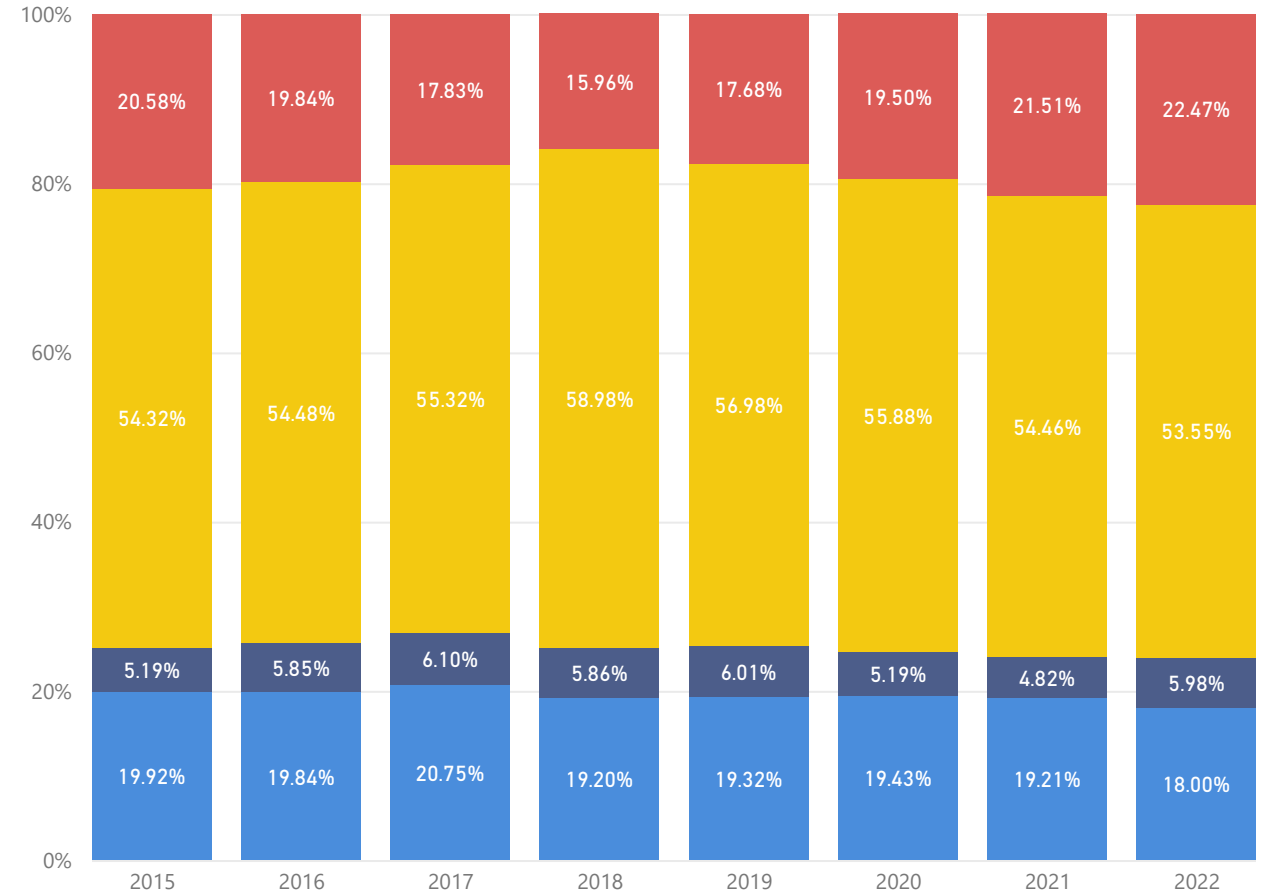

Any substance related discharge diagnosis in district/acute hospitals

● Substance related ● Yes ● No

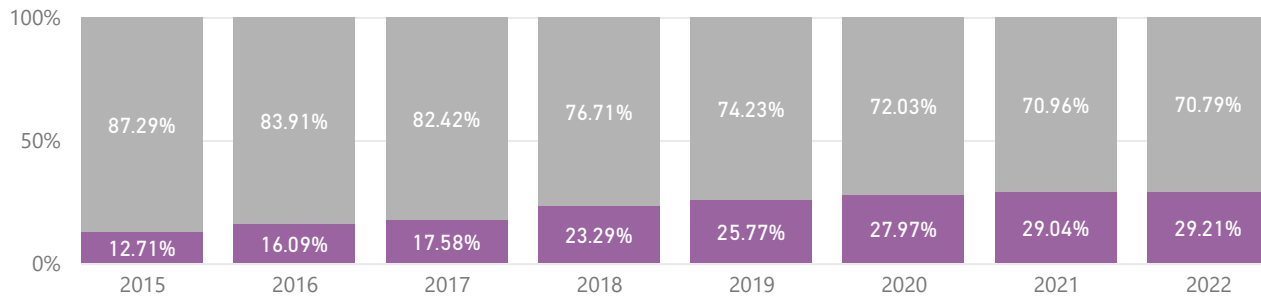

Any substance related discharge diagnosis in general acute psychiatry (specialized hospitals only)

● Substance related ● Yes ● No

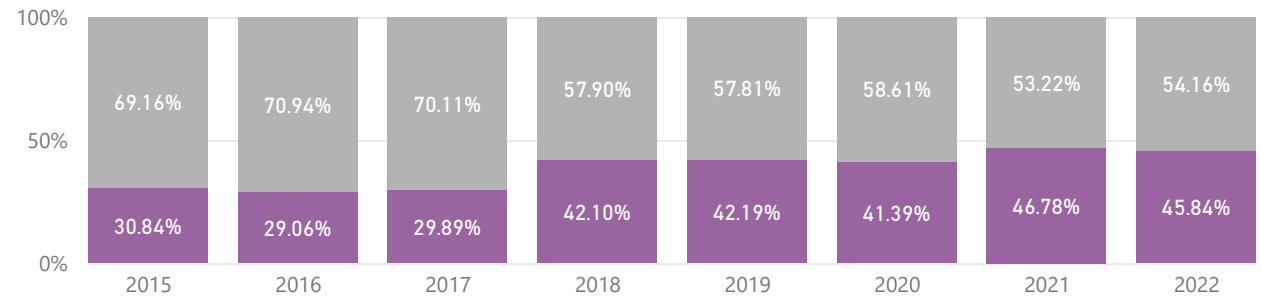

Proportion readmitted within 30 and 90 days, calculated prospectively (i.e., will the "current" admission result in a readmission?)

Proportion readmitted <30days

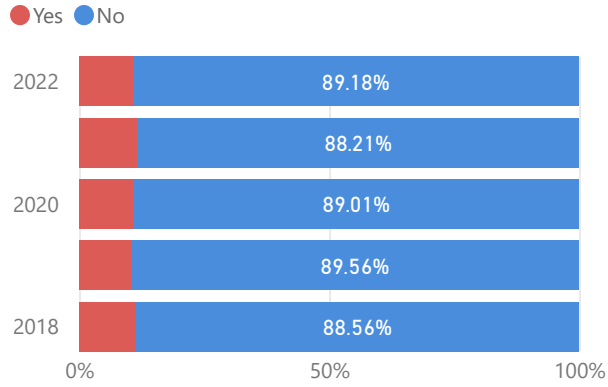

Proportion readmitted <90days

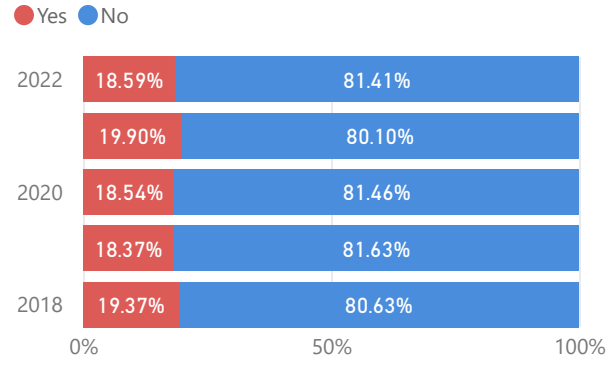

District / acute hospital

Proportion readmitted <30days

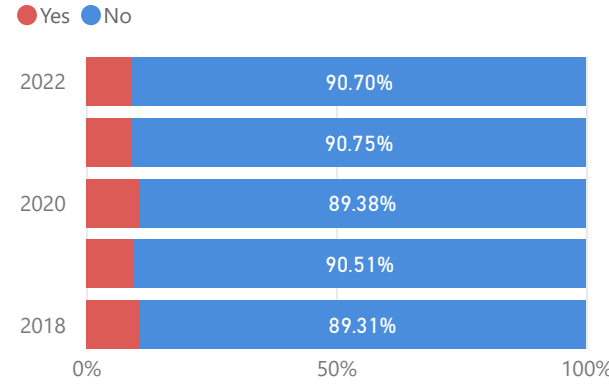

Proportion readmitted <90days

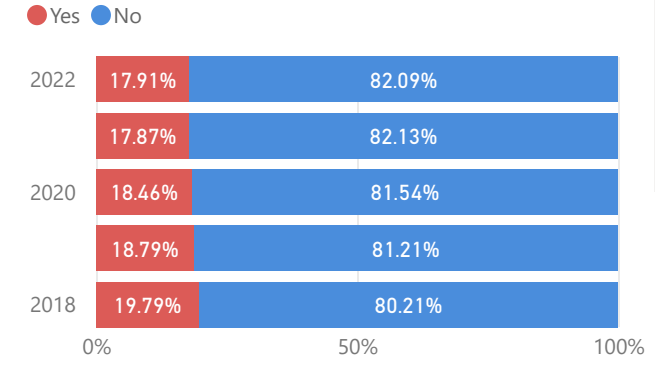

Specialized hospital

Readmission category (calculated retrospectively, i.e., is the "current" admission a repeat admission?)

Legend: > 1 year (dark blue), 1-29d (orange), 30-59 days (yellow), 60-89d (purple), 90-365 days (light blue), First presentation (green)

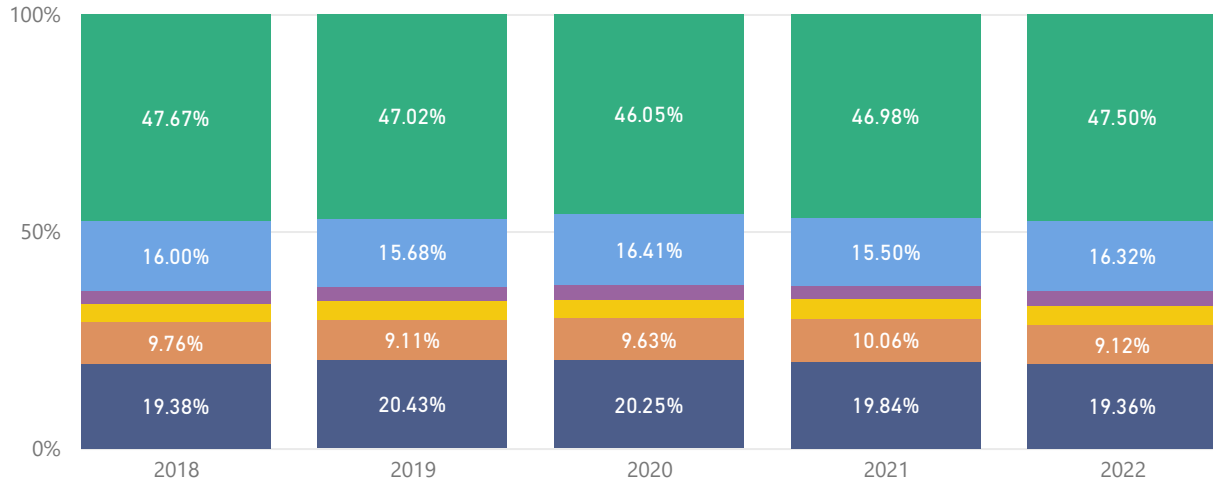

Median days since last psychiatric admission

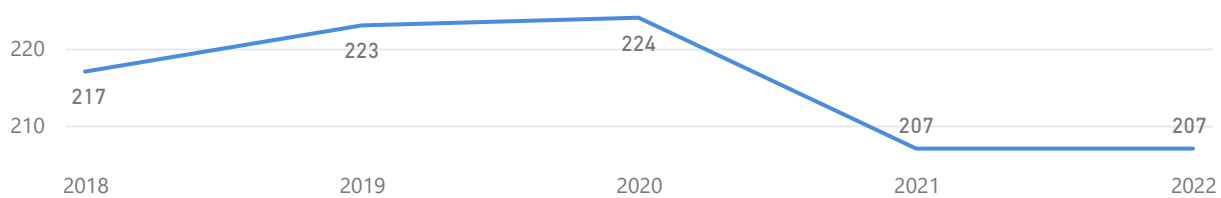

Readmission category (calculated retrospectively, i.e., is the "current" admission a repeat admission?)

Legend: > 1 year (dark blue), 1-29d (orange), 30-59 days (yellow), 60-89d (purple), 90-365 days (light blue), First presentation (green)

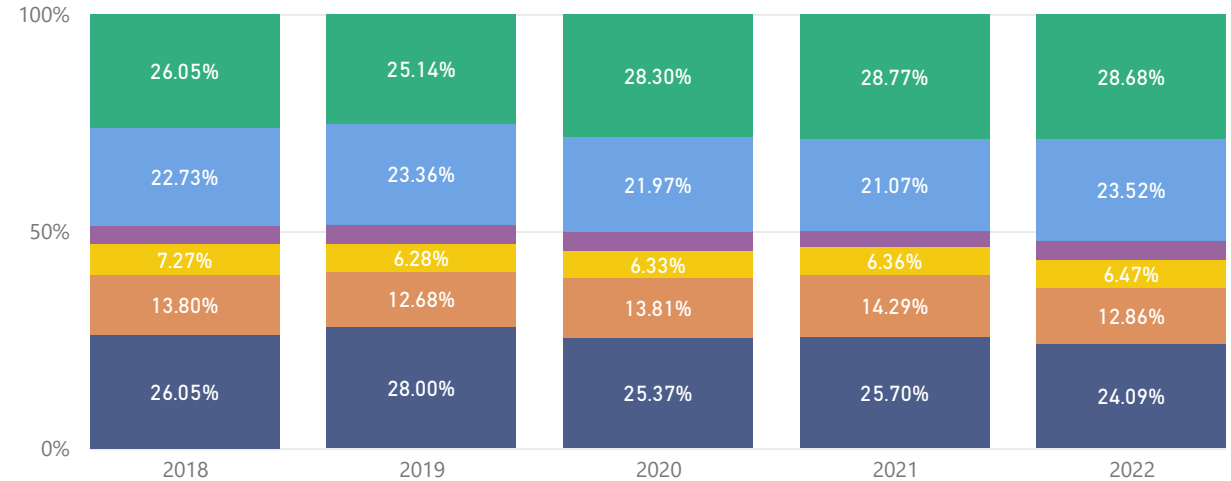

Median days since last psychiatric admission

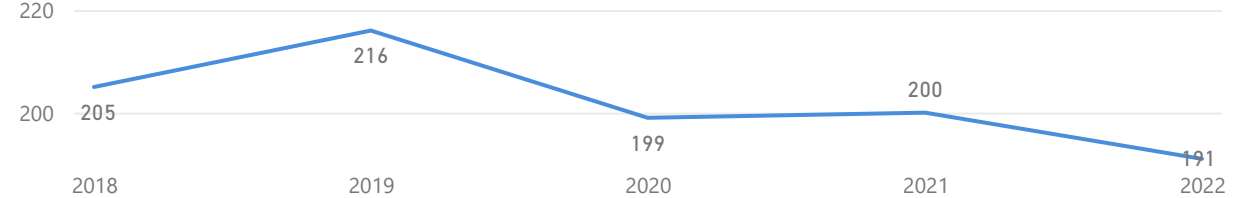

If discharged from district/acute hospital, first contact at clinic/OPD in 30 days or less

● Admission ● No ● No contact ● Yes

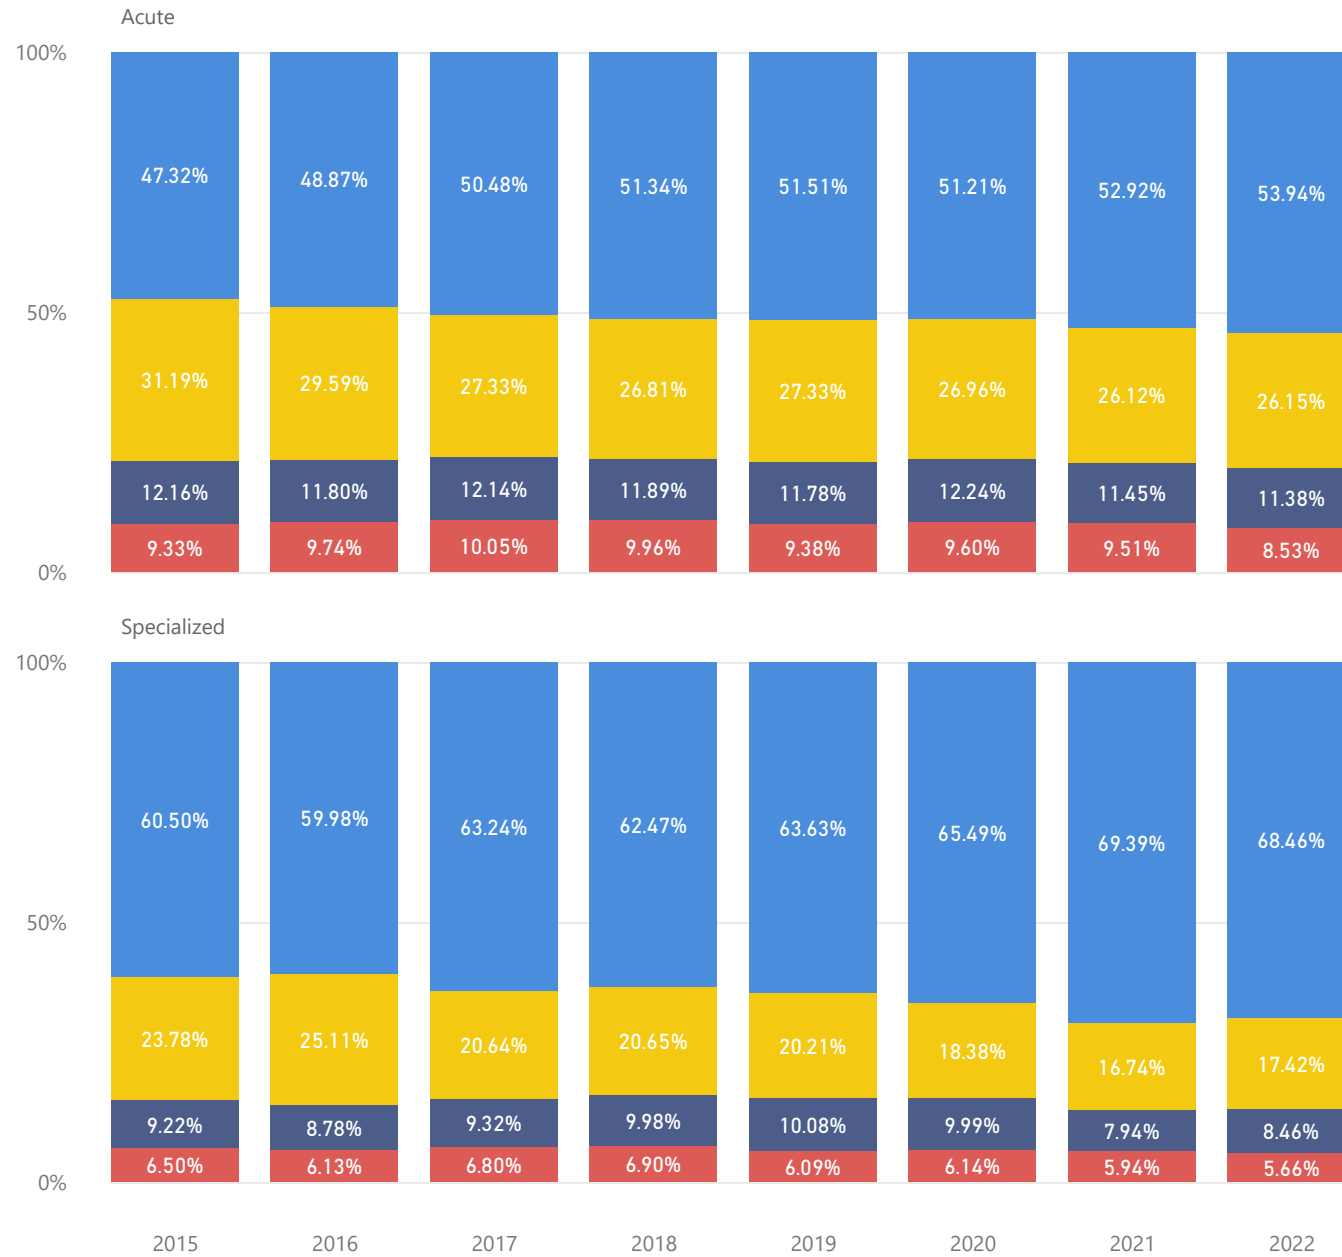

Source: https://medrxiv.org/content/10.1101/2023.05.17.23290107.full.pdf
